# Supplementary material
Source: PubMed Central journal article supplement (PMC3737313)

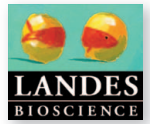

## **Supplemental Material to:**

**Michael D. Amatangelo, Azat Garipov, Hua Li, Jose R. Conejo-Garcia, David W. Speicher and Rugang Zhang**

**Three-dimensional culture sensitizes epithelial ovarian cancer cells to EZH2 methyltransferase inhibition**

**Cell Cycle 2013; 12(13)**

**<http://dx.doi.org/10.4161/cc.25163>**

**<http://www.landesbioscience.com/journals/cc/article/25163>**

**Supplemental Figure 1. The EZH2 inhibitor GSK343 does not significantly affect the growth of human EOC cells in 2D monolayer culture.** (A) OVCAR10 cells were treated with the indicated concentrations of GSK343 or vehicle control (0.1% DMSO). Expression of EZH2, H3K27Me3, H3K9Me3 and  $\beta$ -actin in these cells was determined by immunoblotting. (B) Same as (A) but for SKOV3 cells. (C-E) Cell growth curves for the indicated EOC cells treated with GSK343 (1  $\mu$ M) or vehicle control (0.1% DMSO) over 12 days. Media was changed and cells counted every 3 days, time points represent the mean of 3 independent experiments with SD. \*  $p > 0.05$ . (F) Same as (C-E) but assayed for expression of H3K27Me3 and  $\beta$ -actin by immunoblotting.

**Supplemental Figure 2. The EZH2 inhibitor GSK343 decreases the number of human EOC cells in 3D culture.** Equal number of the indicated human EOC cells cultured in 3D treated with 1  $\mu$ M GSK343 or vehicle control (0.1% DMSO) for 4 days and the number of the cells in each of the indicated groups were counted. \*  $p < 0.01$ .

**Supplemental Figure 3. The EZH2 inhibitor GSK343 suppresses invasion of human EOC cells.**

(A) Equal number of OVCAR10 EOC cells treated with 1  $\mu$ M GSK343 or vehicle control (0.1% DMSO) were assayed for invasion through Matrigel-coated membrane. The cells invaded through Matrigel-coated membrane were stained with 1% crystal violet in PBS. (B) Quantification of (A). Number of SKOV3 cells migrated through control membrane or invaded through Matrigel-coated membrane. Numbers represent mean of 3 independent experiments. \*  $p < 0.05$ . (C-D) Same as (A-B) but for UPN289 cells. \*  $p < 0.05$ .

**Supplemental Figure 4. The EZH2 inhibitor GSK343 induces apoptosis and decreases the G2/M population of EOC cells cultured in 3D conditions.**

(A) The percentage of sub-G1, G1, S, and G2/M of OVCAR10 cells treated with 1  $\mu$ M GSK343 (black bars) or 0.1% DMSO vehicle control (white bars) after 4 days of growth in 2D monolayer culture. Mean of 3 independent experiments. (B) Same as (A) but for OVCAR10 cells cultured in 3D in Matrigel. Mean of three independent experiment with SD. \*  $p < 0.05$ . (C-D) Same as (A-B) but for UPN289 cells. Mean of 3 independent experiments with SD. \*  $p < 0.05$ .

Amatangelo et al. Figure S1

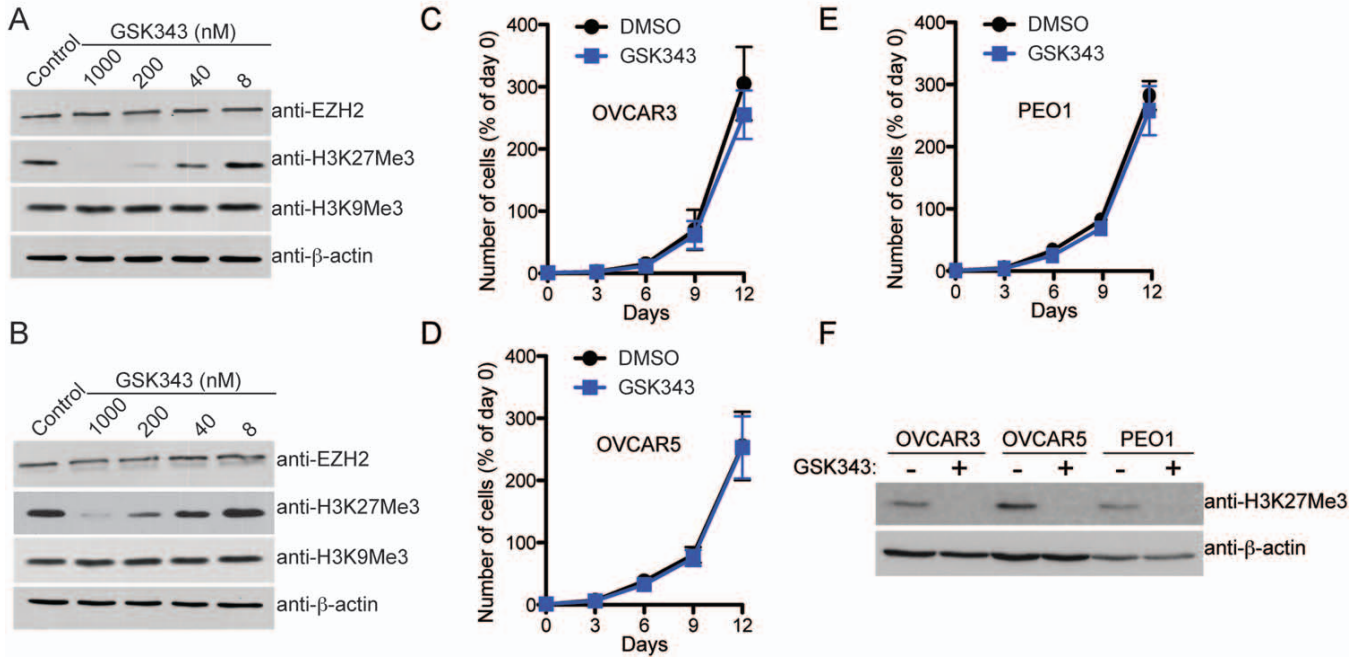

Amatangelo et al. Figure S2

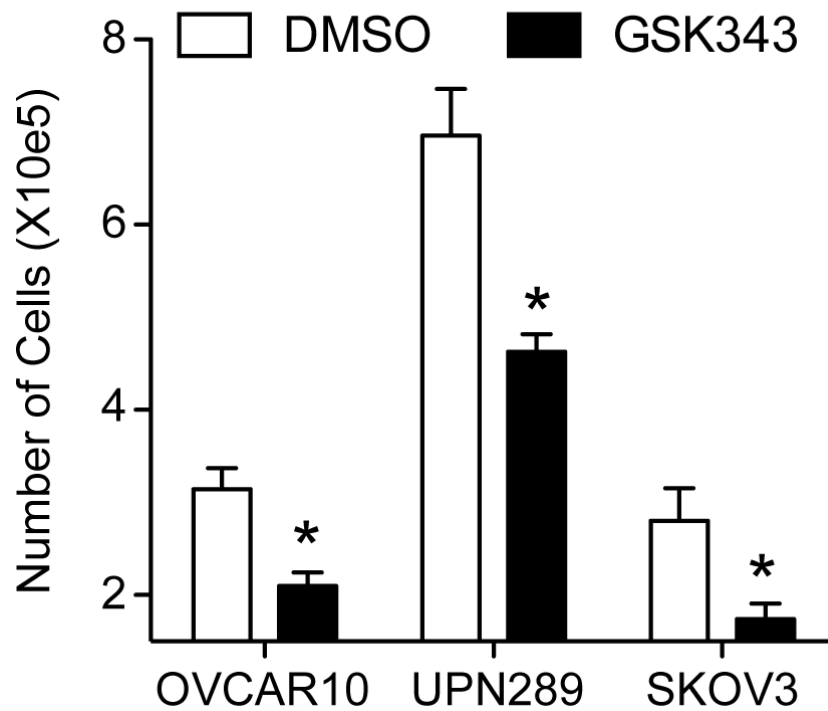

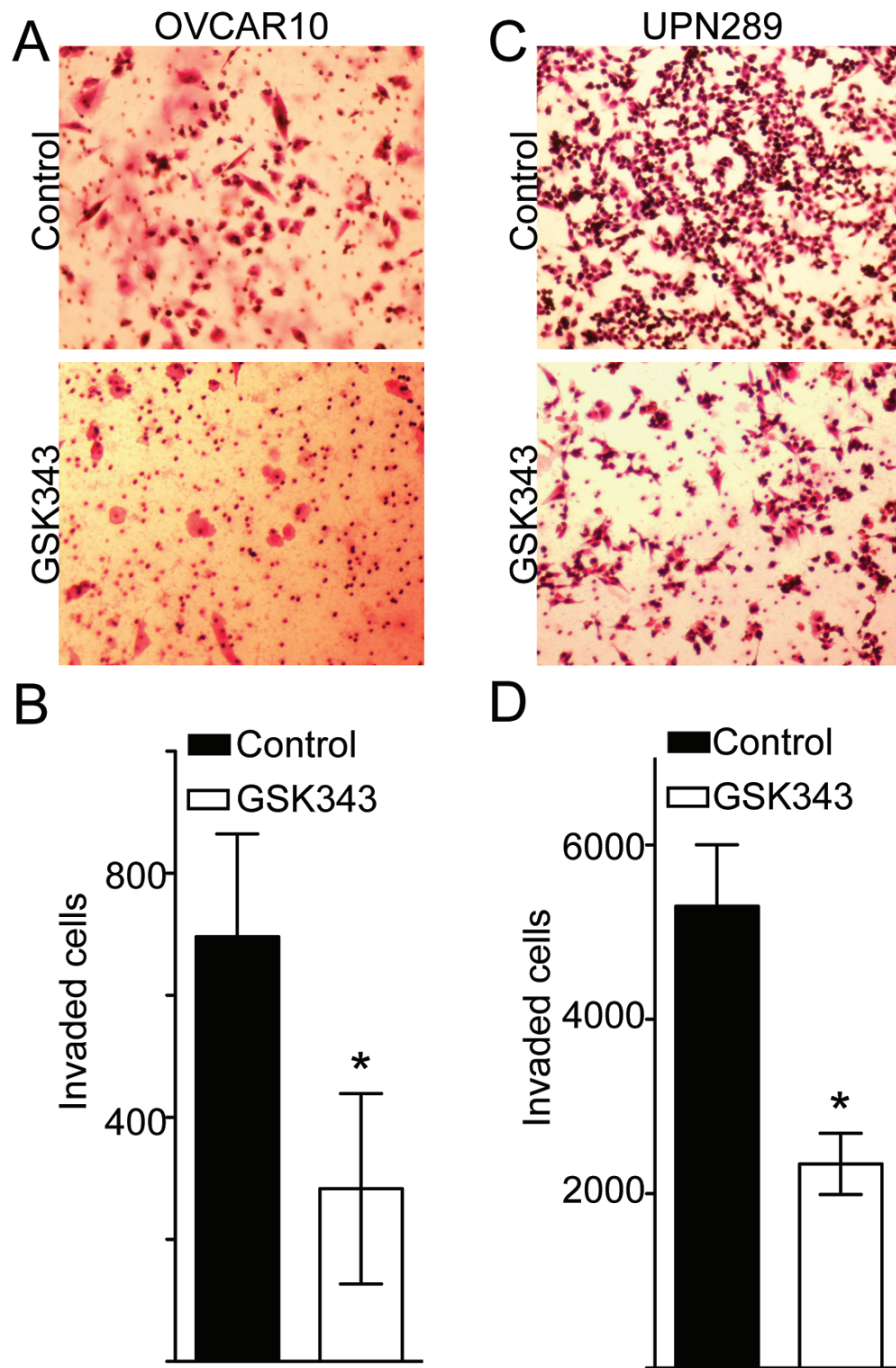

Amatangelo et al. Figure S4

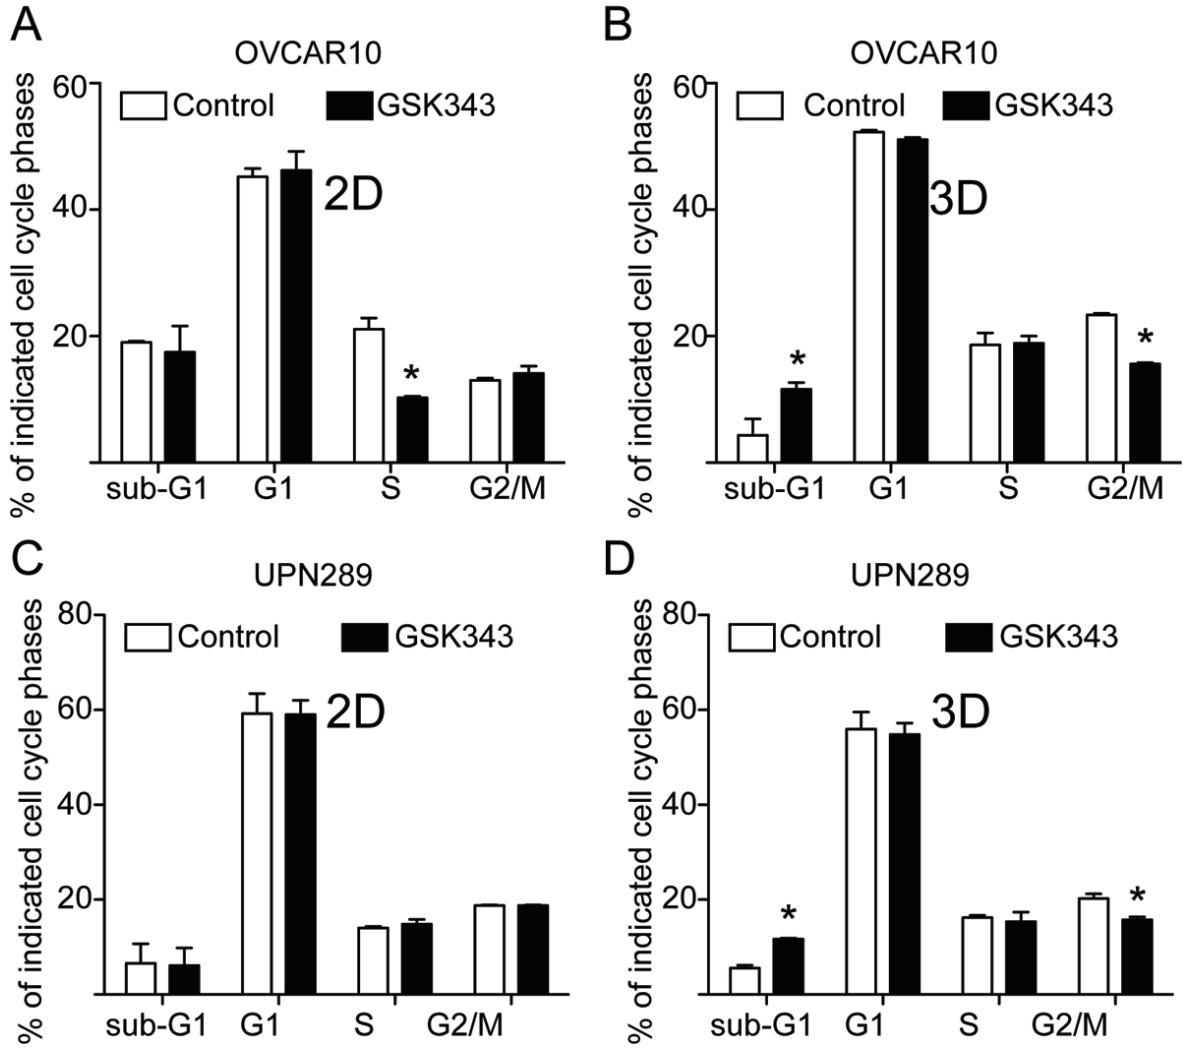

Supplement: cc-12-2113-s01.pdf [file cc-12-2113-s01.pdf]
